# Supplementary material for: Subgrid-scale aerosol–cloud interaction in the atmospheric chemistry model CMA_Meso5.1/CUACE and its impacts on mesoscale meteorology prediction
Source: Copernicus journal article supplement (doi:10.5194/acp-25-9005-2025), 2025-08-19
Supplement: Supplementary file 1 [file acp-25-9005-2025-supplement.pdf]

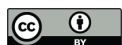

*Supplement of*

**Subgrid-scale aerosol–cloud interaction in the  
atmospheric chemistry model CMA\_Meso5.1/CUACE and  
its impacts on mesoscale meteorology prediction**

**Wenjie Zhang et al.**

*Correspondence to:* Hong Wang (wangh@cma.gov.cn)

The copyright of individual parts of the supplement might differ from the article licence.

# Supplement

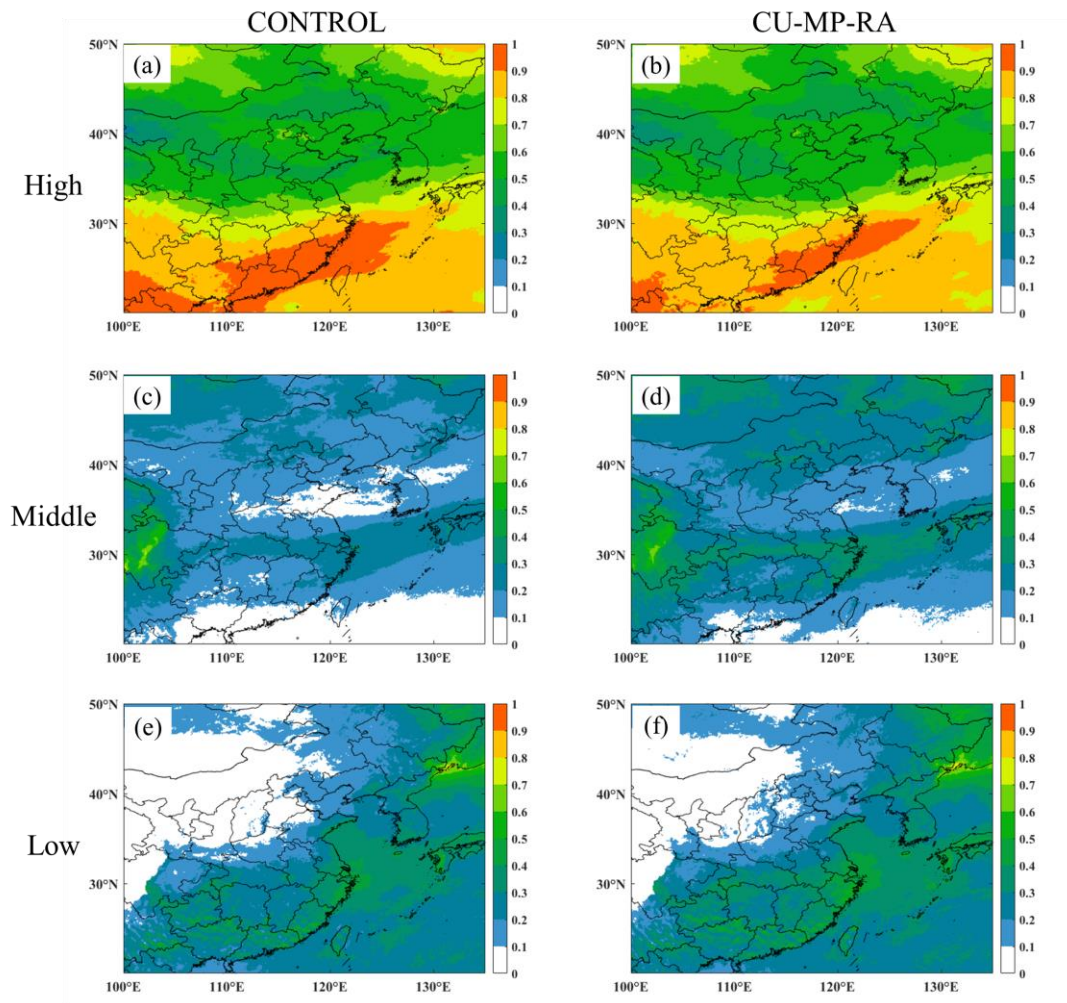

**Figure S1.** The spatial distribution of high (a-b), middle (c-d), and low (e-f) cloud fraction from the CONTROL (left column) and CU-MP-RA experiment (right column).

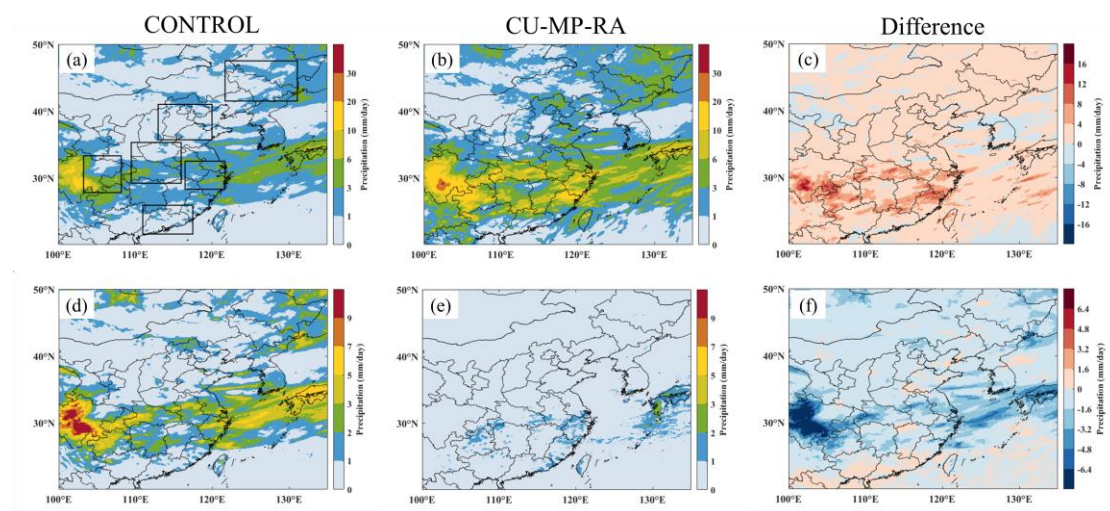

**Figure S2.** The spatial distribution of grid-scale (a-c) and subgrid-scale (d-f) precipitation from the

CONTROL (left column), the CU-MP-RA experiment (middle column), and the difference between the CU-MP-RA and CONTROL experiment (right column).

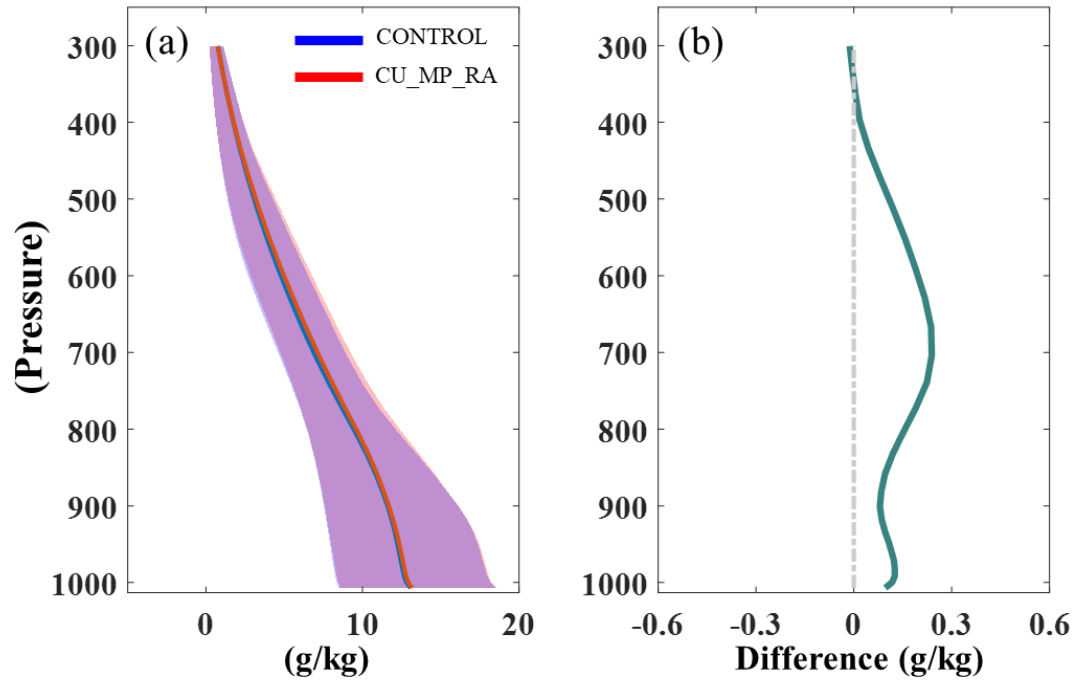

Figure S3: (a) The vertical profiles of water vapor mixing ratio in the Control and CU\_MP\_RA experiment. (b) The difference of vertical water vapor mixing ratio between the Control and CU\_MP\_RA experiment. In the (a), the shadings are the spread of water vapor mixing ratio in six regions, and the solid lines are their average results.

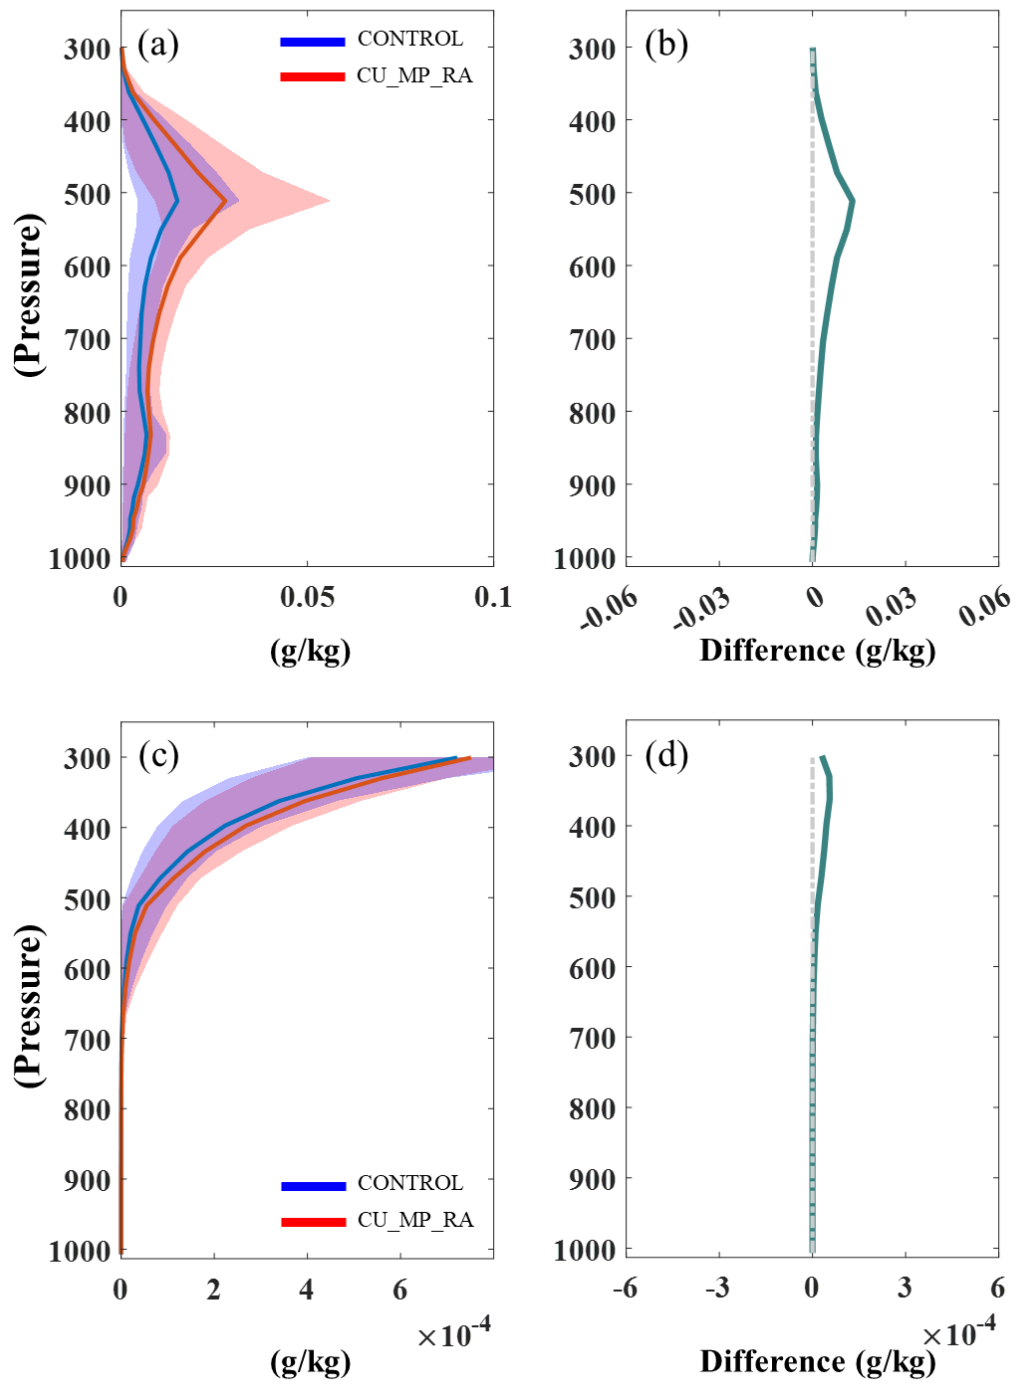

Figure S4: Same with Figure S3, but for cloud water (a and b) and ice (c and d) mixing ratio at grid-scale.
